# Supplementary material
Source: MDPI journal article supplement (https://www.mdpi.com/2304-6732/11/3/284)
Supplement: s1 [file s1]

**Supplementary Materials:**

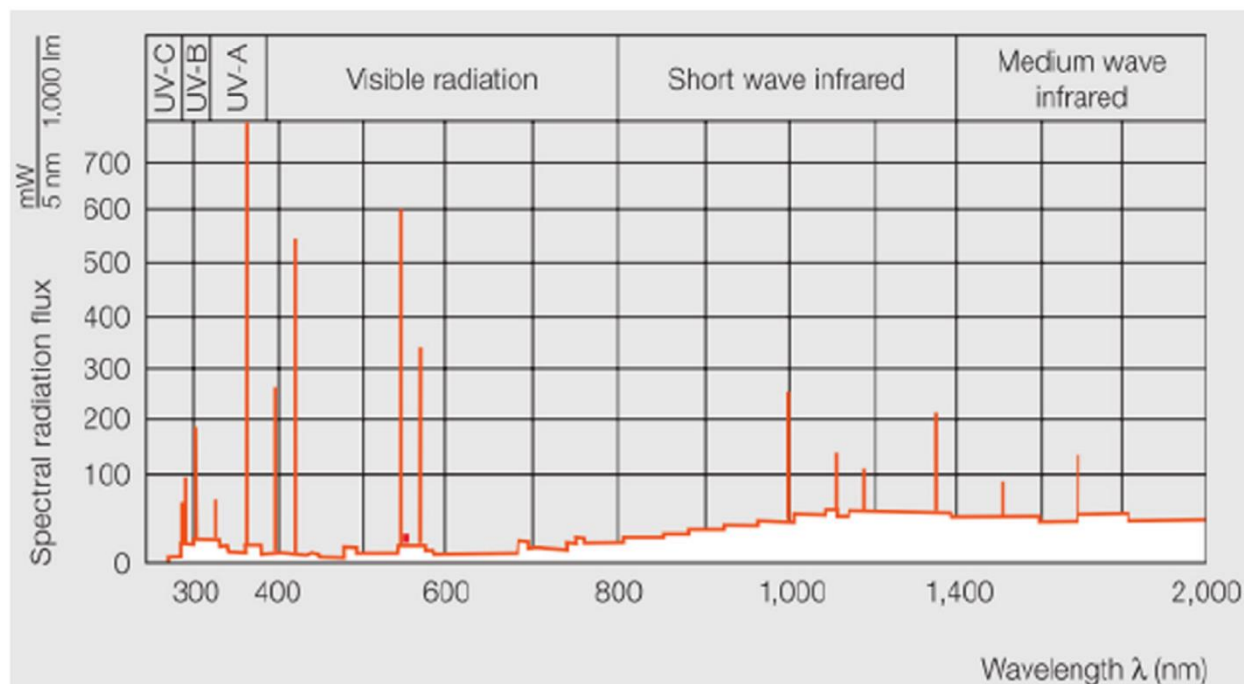

**Figure S1.** The spectral distribution of the 300W OSRAM Ultra-Vitalux lamp. Reprinted with permission from ref. [63]. Copyright 2019 Elsevier and Copyright Clearance Center.

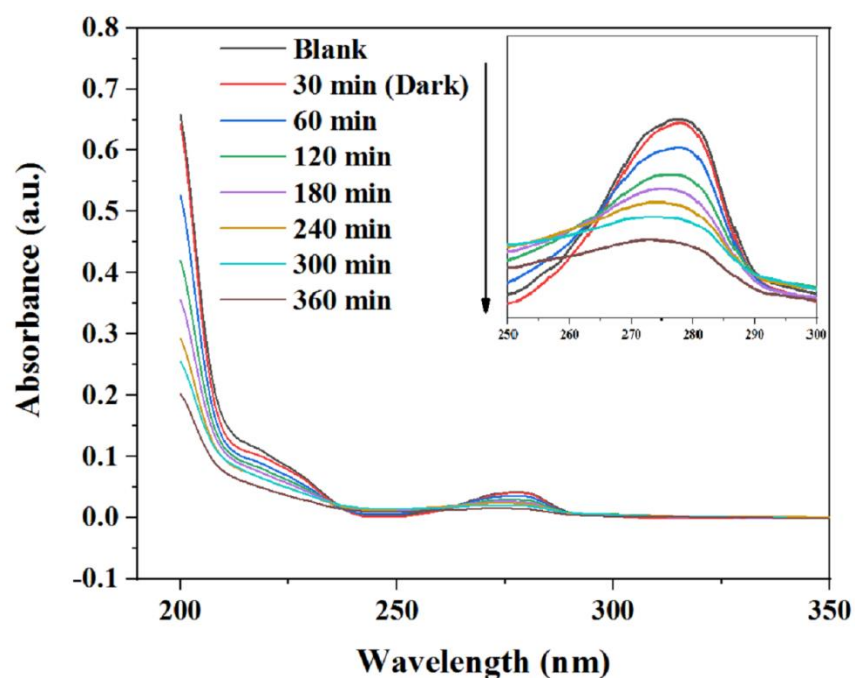

**Figure S2.** Photocatalytic degradation with L15TiO<sub>2</sub> measured with UV-Vis.

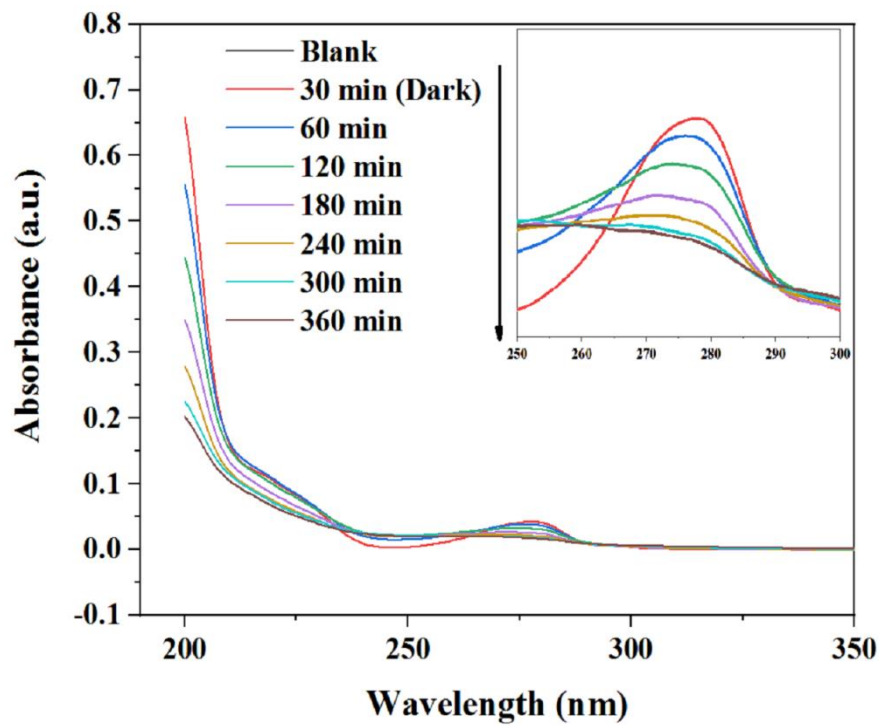

**Figure S3.** Photocatalytic degradation with TiO<sub>2</sub> measured with UV-Vis.

63. Ines, M.; Paolo, P.; Roberto, F.; Mohamed, S. Experimental Studies on the Effect of Using Phase Change Material in a Salinity-Gradient Solar Pond under a Solar Simulator. *Sol. Energy* **2019**, *186*, 335–346, <https://doi.org/10.1016/j.solener.2019.05.011>.
